# Supplementary material for: Targeted Metabolomics of Organophosphate Pesticides and Chemical Warfare Nerve Agent Simulants Using High- and Low-Dose Exposure in Human Liver Microsomes
Source: MDPI journal article supplement (doi:10.3390/metabo13040495), 2023-03-29

## Supporting Information

# Targeted metabolomics of organophosphate pesticides and chemical warfare nerve agent simulants using high and low-dose exposure in human liver microsomes

Garima Agarwal <sup>1</sup>, Hunter Tichenor <sup>2</sup>, Sarah Roo <sup>1</sup>, Thomas R. Lane <sup>3</sup>, Sean Ekins <sup>3</sup> and Craig A. McElroy <sup>1,\*</sup>

<sup>1</sup> Division of Medicinal Chemistry and Pharmacognosy, College of Pharmacy, The Ohio State University, Columbus, OH 43210, USA

<sup>2</sup> Department of Chemistry and Biochemistry, The Ohio State University, Columbus, OH 43210, USA

<sup>3</sup> Collaborations Pharmaceutical Inc., Raleigh, NC 27606, USA

\* Correspondence: mcelroy.31@osu.edu

## Table of Contents

|                                                                                                     |    |
|-----------------------------------------------------------------------------------------------------|----|
| Instrument parameters for OPs .....                                                                 | 2  |
| Clearance rates and decay type of OPs at low- (MS) and high-dose (NMR) regimens .....               | 4  |
| <sup>31</sup> P NMR spectra for formothion and dimethoate (5mM) in the presence of microsomes ..... | 7  |
| <sup>31</sup> P NMR spectra of malathion (5mM) in the presence of microsomes.....                   | 7  |
| Commonly observed metabolites for different OPs.....                                                | 8  |
| Linear calibration curves of representative OPs for low-dose regimen .....                          | 8  |
| Decay curves for OPs at low-(MS) and high-dose (NMR) regimens.....                                  | 10 |

### **Instrument parameters for OPs**

**Table S1: Upper limit of quantification (ULOQ, nM), lower limit of quantification (LLOQ, nM), LD<sub>50</sub> (μM), quantification ion (positive ion mode) and retention time (mins) of OPs developed on a TSQ Quantiva connected to Thermo Vanquish. (Key correlating the abbreviated OP names with the full IUPAC names can be found in the supplemental materials).**

| <b>OPs</b>                        | <b>Monoisotopic mass</b> | <b>Quant Ion</b> | <b>LLOQ</b> | <b>ULOQ</b> | <b>Retention time</b> | <b>LD<sub>50</sub></b> | <b>ISTD</b> |
|-----------------------------------|--------------------------|------------------|-------------|-------------|-----------------------|------------------------|-------------|
| Methamidophos (MMP)               | 141.00                   | 94.30            | 0.21        | 3542.83     | 1.56                  | 6.75 <sup>a, b</sup>   | Ace-d3      |
| Acephate                          | 183.01                   | 143.20           | 0.08        | 2729.71     | 2.36                  | 163.88 <sup>a, b</sup> | Ace-d3      |
| Dimefox                           | 154.07                   | 110.00           | 0.10        | 1622.06     | 4.40                  | 0.21 <sup>a, b</sup>   | TCP-d6      |
| Monocrotophos (MCP)               | 224.00                   | 127.00           | 0.03        | 1120.07     | 4.40                  | 1.99 <sup>a, b</sup>   | TCP-d6      |
| Tricholphon (TCP)                 | 519.90                   | 109.30           | 0.09        | 971.10      | 4.41                  | 26.16 <sup>a, b</sup>  | TCP-d6      |
| Dimethoate                        | 229.00                   | 198.92           | 0.14        | 2180.93     | 4.57                  | 33.95 <sup>a, b</sup>  | PE-d10      |
| Mevinphos (MVP)                   | 224.04                   | 127.30           | 0.13        | 2230.65     | 4.67                  | 0.50 <sup>a, b</sup>   | PE-d10      |
| Schradan                          | 286.13                   | 135.20           | 0.03        | 524.01      | 4.76                  | 0.56 <sup>a, b</sup>   | PE-d10      |
| Phosfolan                         | 255.02                   | 139.92           | 0.45        | 7833.92     | 4.78                  | 1.11 <sup>a, b</sup>   | PE-d10      |
| Formothion                        | 256.99                   | 124.92           | 1.77        | 3886.51     | 4.98                  | 30.86 <sup>a, b</sup>  | PE-d10      |
| Mephosfolan (MPF)                 | 269.03                   | 196.00           | 0.06        | 928.33      | 5.05                  | 31.85 <sup>a, b</sup>  | PE-d10      |
| Phosphamidon-I (PPM-I)            | 299.07                   | 127.00           | 0.05        | 1668.39     | 5.06                  | 0.74 <sup>a, b</sup>   | PE-d10      |
| Dichlorvos (DCV)                  | 219.95                   | 108.92           | 202.73      | 27151.78    | 5.08                  | 11.50 <sup>a, b</sup>  | PE-d10      |
| Phosphamidon-II (PPM-II)          | 299.07                   | 127.00           | 0.05        | 1668.39     | 5.14                  | 0.74 <sup>a, b</sup>   | PE-d10      |
| Diisopropyl fluorophosphate (DFP) | 184.07                   | 100.92           | 38.56       | 21721.42    | 5.24                  | 1.04 <sup>a, b</sup>   | PE-d10      |
| Paraoxon-methyl (PM)              | 247.02                   | 202.07           | 0.12        | 2023.15     | 5.33                  | 0.26 <sup>a, b</sup>   | PE-d10      |
| Dibrom                            | 377.78                   | 127.00           | 0.59        | 2626.19     | 5.60                  | 6.92 <sup>a, b</sup>   | PE-d10      |
| EMP (VX simulant)                 | 307.06                   | 280.40           | 0.15        | 2441.09     | 5.69                  | 0.38 <sup>c, d</sup>   | PE-d10      |
| Heptenophos                       | 250.02                   | 109.00           | 0.46        | 3990.26     | 5.74                  | 12.17 <sup>a, b</sup>  | PE-d10      |
| NEDPA (Tabun simulant)            | 274.07                   | 247.00           | 0.11        | 1823.40     | 5.96                  | 27.52 <sup>e, f</sup>  | PE-d10      |
| Paraoxon-ethyl (PE)               | 275.06                   | 219.92           | 0.07        | 545.08      | 6.02                  | 0.35 <sup>a, b</sup>   | PE-d10      |
| Methidathion (MDT)                | 301.96                   | 145.20           | 0.10        | 1653.82     | 6.08                  | 2.63 <sup>a, b</sup>   | PE-d10      |
| Fenthion Oxon                     | 262.04                   | 216.00           | 0.23        | 942.47      | 6.25                  | 3.11 <sup>a, b</sup>   | PE-d10      |
| Phosmet                           | 317.00                   | 160.00           | 0.09        | 1575.70     | 6.36                  | 11.31 <sup>a, b</sup>  | PE-d10      |
| Azinphos-methyl (APM)             | 317.01                   | 160.00           | 0.09        | 1575.68     | 6.40                  | 0.90 <sup>a, b</sup>   | PE-d10      |
| Ethoprophos (EPP)                 | 242.06                   | 214.92           | 0.12        | 1031.61     | 6.44                  | 5.24 <sup>a, b</sup>   | PE-d10      |
| Malathion                         | 330.04                   | 127.30           | 0.09        | 3027.00     | 6.56                  | 170.96 <sup>a, b</sup> | CPy-d10     |
| Pyridaphenthion (PPT)             | 340.07                   | 189.00           | 0.02        | 1469.16     | 6.78                  | 71.78 <sup>a, b</sup>  | CPy-d10     |
| Triazophos (TAP)                  | 313.07                   | 162.00           | 0.03        | 797.93      | 6.83                  | 6.69 <sup>a, b</sup>   | CPy-d10     |
| Cruformate                        | 291.08                   | 235.90           | 0.10        | 1714.03     | 6.88                  | 103.45 <sup>a, b</sup> | CPy-d10     |

| OPs                       | Monoisotopic mass | Quant Ion | LLOQ   | ULOQ     | Retention time | LD <sub>50</sub>       | ISTD    |
|---------------------------|-------------------|-----------|--------|----------|----------------|------------------------|---------|
| Fenamiphos (FMP)          | 303.11            | 233.92    | 0.10   | 824.10   | 6.91           | 0.63 <sup>a, b</sup>   | CPy-d10 |
| CMP (Cyclosarin simulant) | 361.11            | 280.00    | 0.33   | 1383.76  | 6.92           | 0.32 <sup>g, h</sup>   | CPy-d10 |
| Tetrachlorvinphos (TCVP)  | 363.90            | 127.00    | 0.08   | 1366.31  | 6.96           | 347.20 <sup>a, b</sup> | CPy-d10 |
| Chlorpyrifos Oxon (CPO)   | 332.95            | 277.83    | 0.09   | 1494.77  | 6.99           | 6.27 <sup>a, b</sup>   | CPy-d10 |
| PiMP (Soman simulant)     | 363.12            | 279.92    | 1.25   | 11004.13 | 7.00           | 0.97 <sup>c, g</sup>   | CPy-d10 |
| Iprobenfos (IBF)          | 288.09            | 91.00     | 0.05   | 1734.06  | 7.06           | 74.91 <sup>a, b</sup>  | CPy-d10 |
| Bensulide                 | 397.06            | 355.92    | 0.08   | 628.91   | 7.12           | 21.58 <sup>a, b</sup>  | CPy-d10 |
| Chlorfenvinphos (CFVP)    | 357.97            | 99.00     | 0.04   | 695.28   | 7.18           | 1.06 <sup>a, b</sup>   | CPy-d10 |
| Diazinon                  | 304.10            | 96.92     | 0.03   | 821.42   | 7.20           | 3.32 <sup>a, b</sup>   | CPy-d10 |
| Fenthion                  | 278.02            | 168.00    | 0.22   | 449.11   | 7.21           | 3.64 <sup>a, b</sup>   | CPy-d10 |
| Quinalphos                | 298.05            | 163.00    | 0.10   | 838.08   | 7.26           | 7.56 <sup>a, b</sup>   | CPy-d10 |
| Isofenphos                | 345.11            | 244.00    | 0.36   | 2895.28  | 7.30           | 2.58 <sup>a, b</sup>   | CPy-d10 |
| Cyanofenphos (CFP)        | 303.05            | 156.92    | 0.98   | 824.27   | 7.43           | 4.50 <sup>a, b</sup>   | CPy-d10 |
| Phosalone                 | 366.99            | 182.30    | 0.08   | 1359.40  | 7.50           | 10.36 <sup>a, b</sup>  | CPy-d10 |
| Chlorphoxim (CPh)         | 332.02            | 110.90    | 0.09   | 3005.35  | 7.61           | 238.66 <sup>a, b</sup> | CPy-d10 |
| Isoxathion (IXT)          | 313.05            | 285.00    | 0.10   | 1595.86  | 7.74           | 11.36 <sup>a, b</sup>  | CPy-d10 |
| Leptophos Oxon            | 393.89            | 155.00    | 0.29   | 10101.01 | 7.75           | 9.47 <sup>a, b</sup>   | CPy-d10 |
| Pirimiphos Ethyl (PPE)    | 333.13            | 198.00    | 0.03   | 749.87   | 7.79           | 13.34 <sup>a, b</sup>  | CPy-d10 |
| Pyrazophos (PZP)          | 373.09            | 222.00    | 0.08   | 1339.19  | 7.85           | 12.85 <sup>a, b</sup>  | CPy-d10 |
| Iodofenphos (IFP)         | 411.84            | 125.00    | 73.61  | 9685.23  | 8.04           | 179.21 <sup>a, b</sup> | CPy-d10 |
| Chlorpyrifos (CPy)        | 348.93            | 197.97    | 0.04   | 713.08   | 8.05           | 5.98 <sup>a, b</sup>   | CPy-d10 |
| Aspon                     | 378.09            | 210.83    | 0.31   | 660.68   | 8.33           | 141.45 <sup>i</sup>    | CPy-d10 |
| Temephos                  | 465.99            | 418.92    | 0.98   | 1071.81  | 8.46           | 68.09 <sup>a, b</sup>  | CPy-d10 |
| Merphos                   | 298.10            | 169.00    | 101.84 | 13400.34 | 8.50           | 73.43 <sup>a, b</sup>  | CPy-d10 |
| Tribufos                  | 314.10            | 168.92    | 0.20   | 3179.65  | 8.62           | 3.12 <sup>a, b</sup>   | CPy-d10 |
| Leptophos                 | 409.87            | 77.00     | 9.71   | 9707.32  | 8.88           | 3.32 <sup>a, b</sup>   | CPy-d10 |

References: (a): Kim et. al., 2021<sup>25</sup>; (b) Lewis et. al., 2016<sup>26</sup>; (c) Misik et. al., 2015<sup>28</sup>; (d) Amitai et. al., 2006<sup>30</sup>; (e) Meek et. al., 2012<sup>23</sup>; (f) Sivam et. al., 1984<sup>32</sup>; (g) Gupta et. al., 2011<sup>29</sup>; (h) Amitai et. al., 2007<sup>31</sup>; (i) Backus et. al., 1982<sup>24</sup>.

### Clearance rates and decay type of OPs at low- (MS) and high-dose (NMR) regimens

Table S2: Intrinsic clearance rates of OPs in HLMs and the percent of OP remaining after incubation at both low- (MS) and high-dose (NMR) regimens and the metabolism type, monophasic decay (OPD) or biphasic decay (BPD), and NA for OPs that were not water soluble at the high concentration. The legend for the table is given below:

|             | NMR   | MS     | Biphasic in both (NMR and MS)                                                 |
|-------------|-------|--------|-------------------------------------------------------------------------------|
| Cl (int)    |       |        | Biphasic in NMR                                                               |
| Low         | <1    | <20    | Biphasic in MS                                                                |
| Mid         | 1-10  | 20-100 | MS: BPD but fast half life too quick to determine with the given time points  |
| High        | >10   | >100   | NMR: BPD but fast half life too quick to determine with the given time points |
| % Remaining |       |        | Span <2*Sy.x: Clearance rate negligibe: NMR                                   |
| Low         | <30   |        | Span <2*Sy.x: Clearance rate negligibe: both                                  |
| Mid         | 30-80 |        | Span <2*Sy.x: Clearance rate negligibe: MS                                    |
| High        | >80   |        |                                                                               |

|             |            |        | Data based on MS  |                  |             | Data based on NMR |                  |             |
|-------------|------------|--------|-------------------|------------------|-------------|-------------------|------------------|-------------|
| OP          | Decay Type | MW     | Cl <sub>int</sub> | Half-life (hour) | % Remaining | Cl <sub>int</sub> | Half-life (hour) | % Remaining |
| Acephate    | OPD        | 183.17 | 60.987            | 0:22:44          | 91.90       | 8.875             | 1:57:08          | 90          |
| APM         | OPD        | 317.32 | 45.150            | 0:30:42          | 5.00        | 6.798             | 2:02:20          | 0           |
| Aspon-Fast  | BPD        | 378.40 | 664.459           | 0:02:05          | 13.00       | 3.955             | 4:22:51          | 60          |
| Aspon-Slow  |            |        | 7.126             | 3:14:29          | 1.62        | 0.509             | 10:01:04         | 5           |
| Bensulide   | OPD        | 397.51 | 9.136             | 2:31:43          | 0.45        | NA                |                  |             |
| CFP         | OPD        | 303.30 | 14.923            | 1:32:53          | 20.00       |                   |                  |             |
| CFVP        | OPD        | 359.57 | 73.904            | 0:18:45          | 0.52        |                   |                  |             |
| CMP         | OPD        | 361.33 | 145.549           | 0:09:31          | 6.87        | 1.693             | 10:13:57         | 17.6        |
| CPh         | OPD        | 332.74 | 152.708           | 0:09:05          | 20.00       | NA                |                  |             |
| CPO         | OPD        | 334.50 | 61.187            | 0:22:39          | 0.55        | 6.707             | 2:35:00          | 10.3        |
| CPy         | OPD        | 350.59 | 12.015            | 1:55:21          | 28.00       | NA                |                  |             |
| Crufomate   | OPD        | 291.71 | 155.267           | 0:08:56          | 20.00       |                   |                  |             |
| DCV         | OPD        | 220.98 | 3.027             | 7:37:50          | 31.00       | 1.322             | 13:00:40         | 2           |
| DFP         | OPD        | 184.15 | 3.683             | 6:16:18          | 27.00       | 0.684             | 1:20:04          | 40          |
| Diazinon    | OPD        | 304.35 | 28.194            | 0:49:10          | 32.00       | 7.759             | 2:13:58          | 30          |
| Dibrom-Fast | BPD        | 380.78 | 461.902           | 0:03:00          | 23.00       | 8.193             | 2:01:48          | 75          |
| Dibrom-Slow |            |        | 123.194           | 0:11:15          | 0.38        |                   |                  |             |
| Dimefox     | OPD        | 154.13 | 129.832           | 0:10:41          | 80.00       | 0.382             | 12:15:36         | 100         |
| Dimethoate  | OPD        | 229.26 | 72.125            | 0:19:13          | 95.00       | 0.232             | 11:44:01         | 87          |
| EMP-Fast    | BPD        | 307.24 | 83.042            | 0:16:41          | 0.62        | 5.589             | 3:05:59          | 50          |
| EMP-Slow    |            |        |                   |                  |             | 0.297             | 10:15:27         | 0.1         |
| EPP         | OPD        | 242.34 | 36.572            | 0:37:54          | 4.00        | NA                |                  |             |
| Fenthion    | OPD        | 278.33 | 53.009            | 0:26:09          | 23.00       |                   |                  |             |

|                 |            |        | Data based on MS  |                  |             | Data based on NMR |                  |             |
|-----------------|------------|--------|-------------------|------------------|-------------|-------------------|------------------|-------------|
| OP              | Decay Type | MW     | Cl <sub>int</sub> | Half-life (hour) | % Remaining | Cl <sub>int</sub> | Half-life (hour) | % Remaining |
| Fethion Oxon    | OPD        | 265.26 | 17.030            | 1:21:23          | 90.00       |                   |                  |             |
| FMP             | OPD        | 303.36 | 59.767            | 0:23:11          | 50.00       |                   |                  |             |
| Formothion-Fast | BPD        | 257.30 | 24.555            | 0:56:27          | 0.11        | 22.27             | 0:46:41          | 70          |
| Formothion-Slow |            |        | 3.495             | 6:36:32          | 0.11        | 2.623             | 6:36:19          | 47          |
| Heptenophos     | OPD        | 250.61 | 2.901             | 7:57:42          | 60.00       | 0.245             | 22:42:02         | 85.8        |
| IBF             | OPD        | 288.34 | 5.831             | 3:57:42          | 79.00       | 98.571            | 0:08:26          | 30          |
| IFP-Fast        | BPD        | 413.00 | 118.635           | 0:11:41          | 74.31       | NA                |                  |             |
| IFP-Slow        |            |        | 3.019             | 7:39:02          | 0.30        |                   |                  |             |
| Isofenphos      | OPD        | 345.39 | 61.387            | 0:22:35          | 0.80        |                   |                  |             |
| IXT-Fast        | BPD        | 313.31 | 107.777           | 0:12:52          | 82.00       |                   |                  |             |
| IXT-Slow        |            |        | 5.281             | 4:22:28          | 15.00       |                   |                  |             |
| Leptophos       | OPD        | 412.06 | 5.799             | 3:59:01          | 3.51        |                   |                  |             |
| Leptophos Oxon  | OPD        | 396.00 | 13.217            | 1:44:52          | 3.36        |                   |                  |             |
| Malathion-Fast  | BPD        | 330.36 | 2245.523          | 0:00:37          | 20.00       | 11.149            | 1:33:14          | 4.5         |
| Malathion-Slow  |            |        | 10.092            | 2:17:20          | 1.80        | NA                |                  |             |
| MCP             | OPD        | 223.20 | 11.288            | 2:02:47          | 95.00       | 0.002             | 21:05:00         | 89.8        |
| MDT             | OPD        | 302.33 | 18.370            | 1:15:27          | 46.50       | 1.716             | 10:05:54         | 55          |
| Merphos-Fast    | BPD        | 298.50 | 127.033           | 0:00:37          | 72.00       | 2.169             | 6:23:23          | 60          |
| Merphos-Slow    |            |        | 8.876             | 2:17:20          | 1.44        |                   |                  |             |
| MMP             | OPD        | 141.13 | 10.590            | 2:10:53          | 97.00       | 1.582             | 10:57:01         | 94          |
| MPF             | OPD        | 269.30 | 4.859             | 4:45:15          | 96.00       | 1.296             | 10:41:48         | 97          |
| MVP-I           | OPD        | 224.15 | 6.867             | 3:21:51          | 0.75        | 0.008             | 10:53:49         | 82          |
| MVP-II          | OPD        | 224.15 | 10.684            | 2:09:44          | 0.36        | 18.911            | 0:54:58          | 98          |
| NEDPA           | OPD        | 274.21 | 24.895            | 0:55:40          | 70.00       | 0.742             | 23:20:00         | 57          |
| PE              | OPD        | 275.19 | 25.355            | 0:54:40          | 68.00       | 0.035             | 13:16:23         | 73          |
| Phosalone       | OPD        | 367.81 | 23.415            | 0:59:12          | 2.00        | NA                |                  |             |
| Phosfolan       | OPD        | 255.30 | 70.545            | 0:19:39          | 95.00       | 1.394             | 12:25:38         | 90          |
| Phosmet         | OPD        | 317.32 | 13.607            | 1:41:52          | 4.00        | NA                |                  |             |
| PiMP            | OPD        | 363.50 | 55.888            | 0:24:48          | 50.00       | 1.573             | 11:00:46         | 65          |
| PM              | OPD        | 247.14 | 30.354            | 0:45:40          | 68.00       | 0.072             | 2:11:23          | 48          |
| PPE-Fast        | BPD        | 333.39 | 45.010            | 0:30:48          | 60.00       | NA                |                  |             |
| PPE-Slow        |            |        | 7.072             | 3:15:58          | 3.50        |                   |                  |             |
| PPM-I           | OPD        | 299.69 | 35.572            | 0:38:58          | 89.00       | 0.36              | 16:49:19         | 80          |
| PPM-II          | OPD        | 299.69 | 4.335             | 5:19:43          | 22.00       | 0.026             | 7:09:23          | 60          |
| PPT             | OPD        | 340.33 | 347.926           | 0:03:59          | 45.00       | NA                |                  |             |
| PZP             | OPD        | 373.36 | 19.158            | 1:12:21          | 42.00       |                   |                  |             |
| Quinalphos      | OPD        | 298.30 | 21.156            | 1:05:31          | 15.45       |                   |                  |             |
| Schradan        | OPD        | 286.25 | 64.786            | 0:21:24          | 41.00       | 0.928             | 14:56:14         | 73.8        |

|               |            |        | Data based on MS  |                  |             | Data based on NMR |                  |             |
|---------------|------------|--------|-------------------|------------------|-------------|-------------------|------------------|-------------|
| OP            | Decay Type | MW     | Cl <sub>int</sub> | Half-life (hour) | % Remaining | Cl <sub>int</sub> | Half-life (hour) | % Remaining |
| TAP           | OPD        | 313.31 | 5.829             | 3:57:47          | 52.00       | NA                |                  |             |
| TCP-Fast      | BPD        | 257.44 | 0.001             | 18:01:23         | 85.00       | 2.506             | 6:54:49          | 50          |
| TCP-Slow      |            |        |                   |                  |             | 0.002             | 13:35:34         | 13.7        |
| TCVP          | OPD        | 365.95 | 71.225            | 0:19:28          | 60.00       | NA                |                  |             |
| Temephos      | OPD        | 466.50 | 126.593           | 0:10:57          | 11.00       |                   |                  |             |
| Tribufos-Fast | BPD        | 314.50 | 219.353           | 0:06:19          | 10.00       | NA                |                  |             |
| Tribufos-Slow |            |        | 71.265            | 0:19:27          | 0.14        |                   |                  |             |

### <sup>31</sup>P NMR spectra for formothion and dimethoate (5mM) in the presence of microsomes

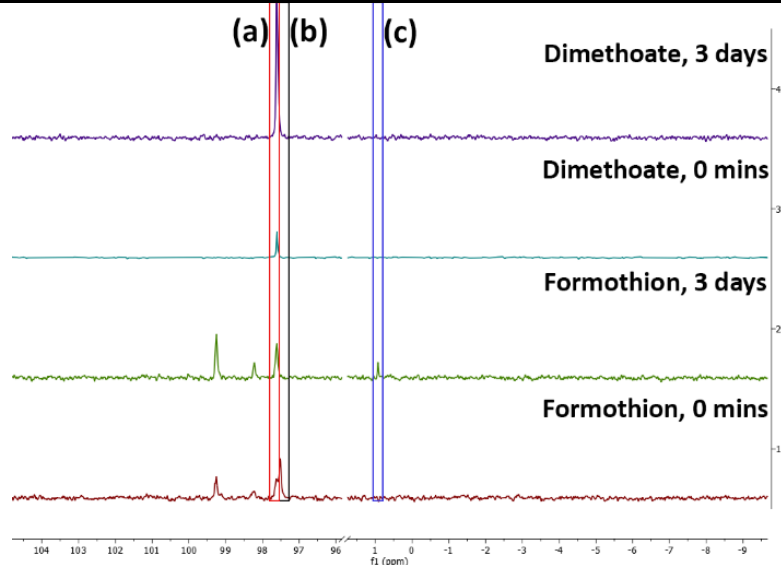

**Figure S1:** Stacked <sup>31</sup>P NMR spectra (in D<sub>2</sub>O) of formothion and dimethoate at time points 0 and 3 days: (a) dimethoate  $\delta_P$  97.61 ppm present in formothion <sup>31</sup>P NMR spectra; (b) formothion  $\delta_P$  97.51 ppm present in HLM incubation but absent in dimethoate HLM incubation; (c) minor peak, at  $\delta_P$  0.92 ppm, observed in formothion HLM incubation after 3 days.

### <sup>31</sup>P NMR spectra of malathion (5mM) in the presence of microsomes

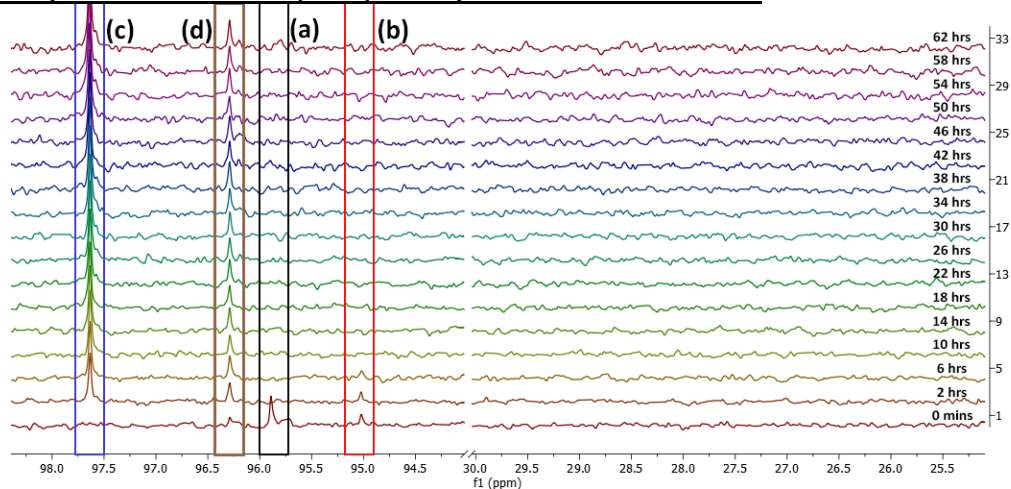

**Figure S2:** Stacked <sup>31</sup>P-NMR spectra of malathion (4, D<sub>2</sub>O) in the presence of HLMs over a period of days: (a) malathion  $\delta_P$  95.89 ppm; (b) major metabolite of 4  $\delta_P$  95.02 ppm that further metabolizes to give metabolites c and d; (c) other metabolites from 4 and b  $\delta_P$  97.63 ppm (c) and 96.28 ppm (d).

### Commonly observed metabolites for different OPs

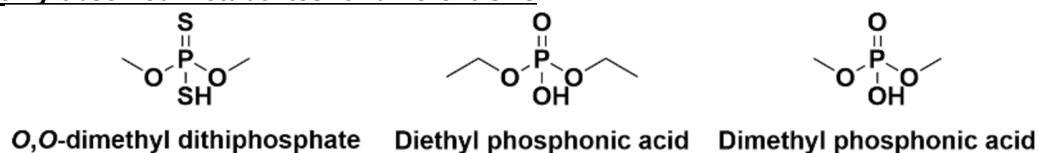

**Figure S3:** Structures of the commonly observed metabolites across different OPs based on their <sup>31</sup>P-NMR chemical shifts.

### Linear calibration curves of representative OPs for low-dose regimen

**Table S3:** Calibration curves of representative OPs (At low-dose regimen, MS).

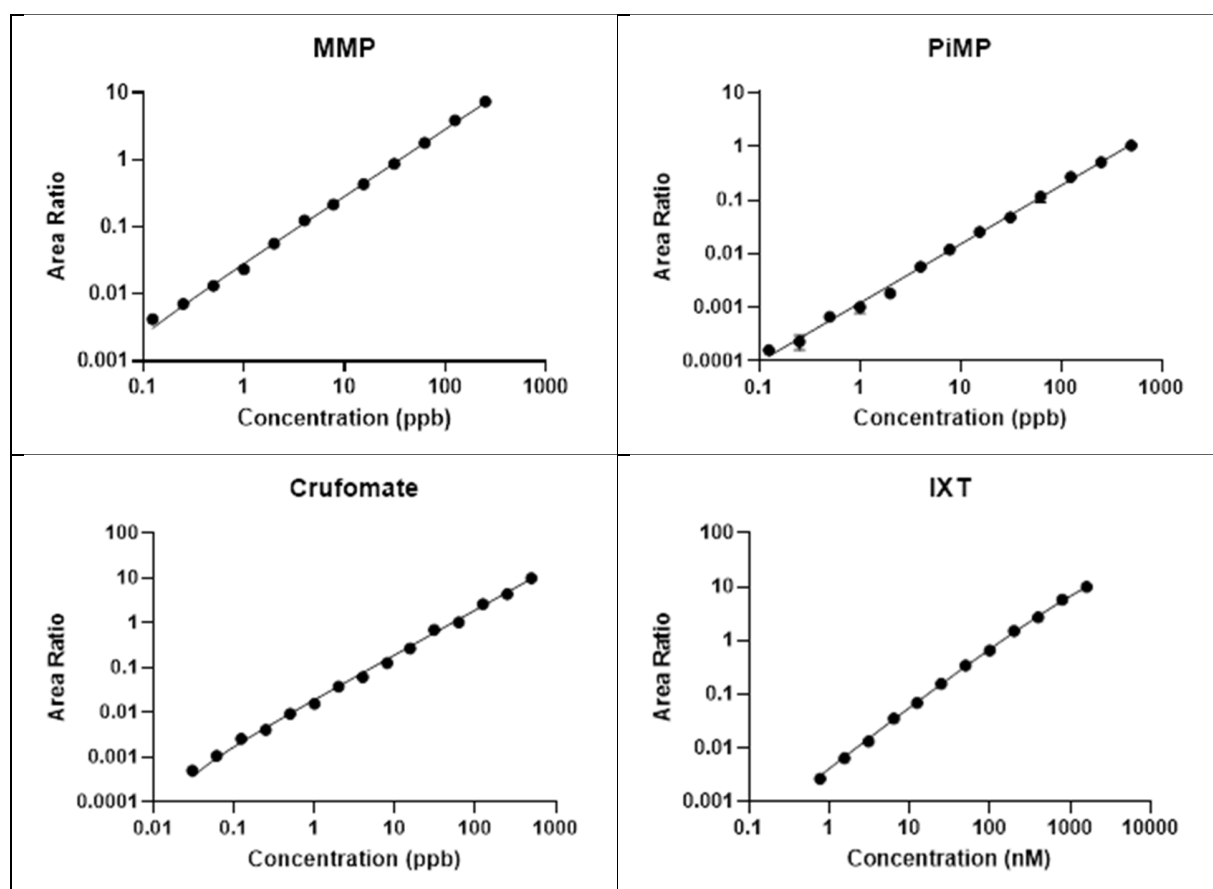



**Leptophos Oxon**

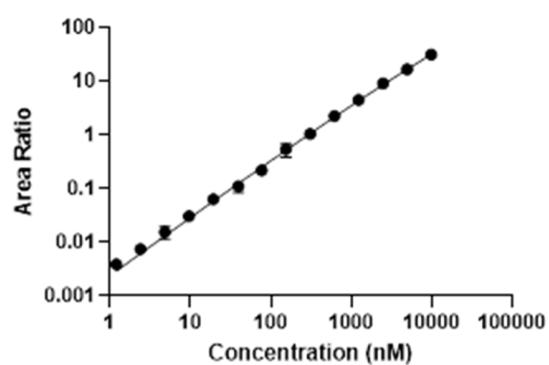

**Merphos**

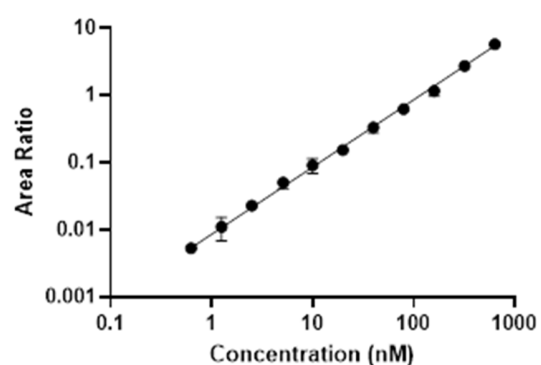

**TCVP**

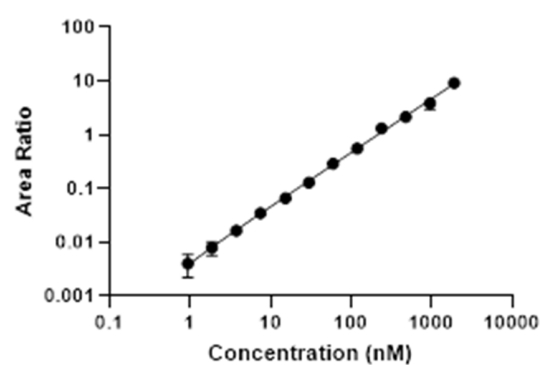

**Diazinon**

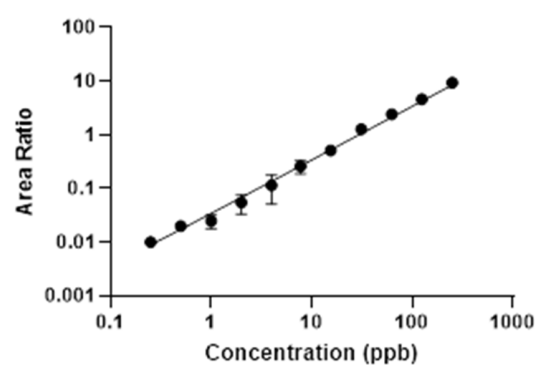

**Decay curves for OPs at low-(MS) and high-dose (NMR) regimens**

**Table S4: Clearance rate graphs of representative OPs.**

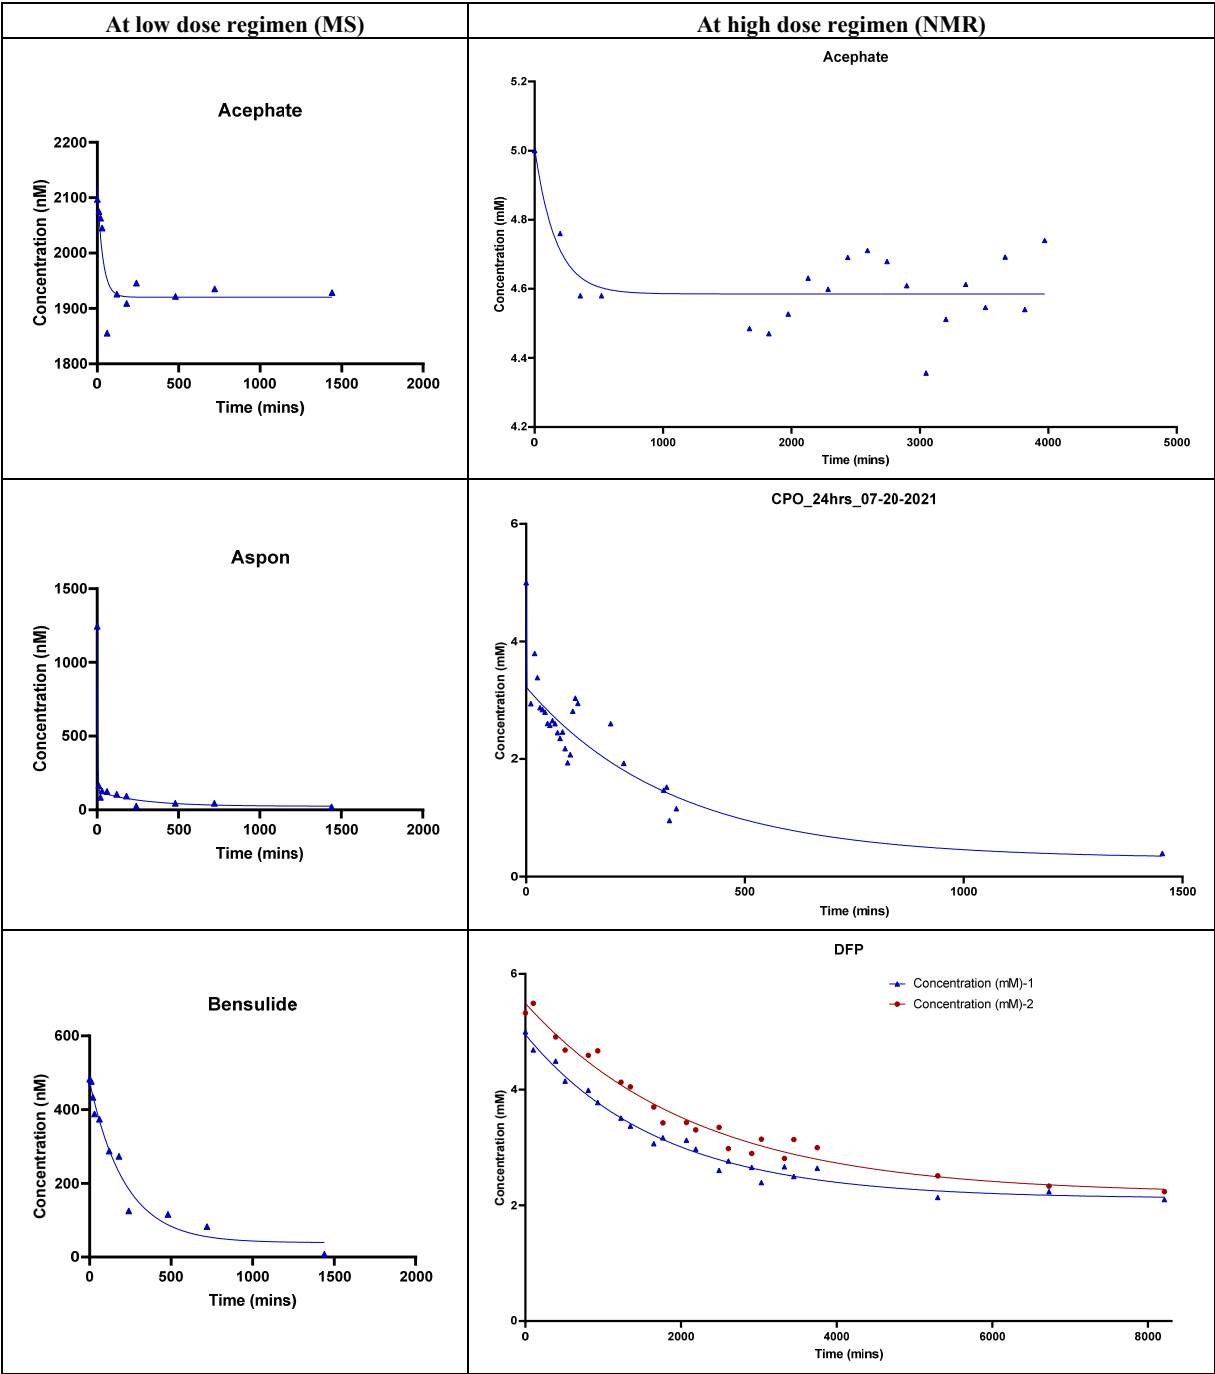

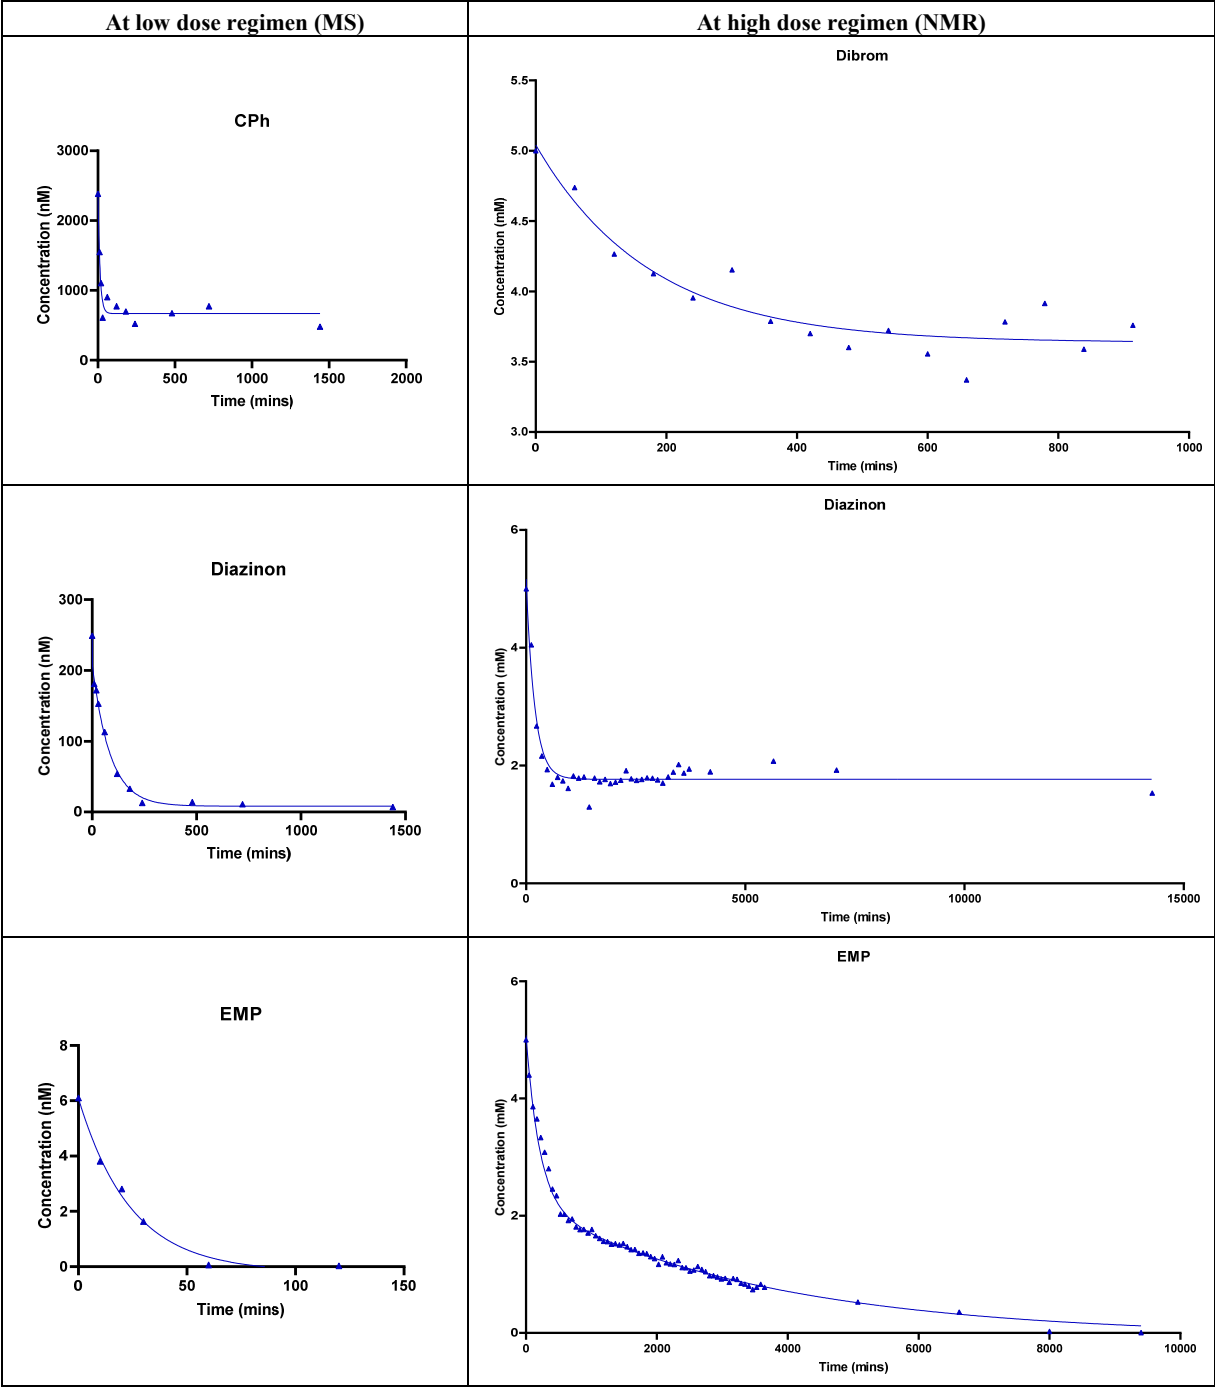

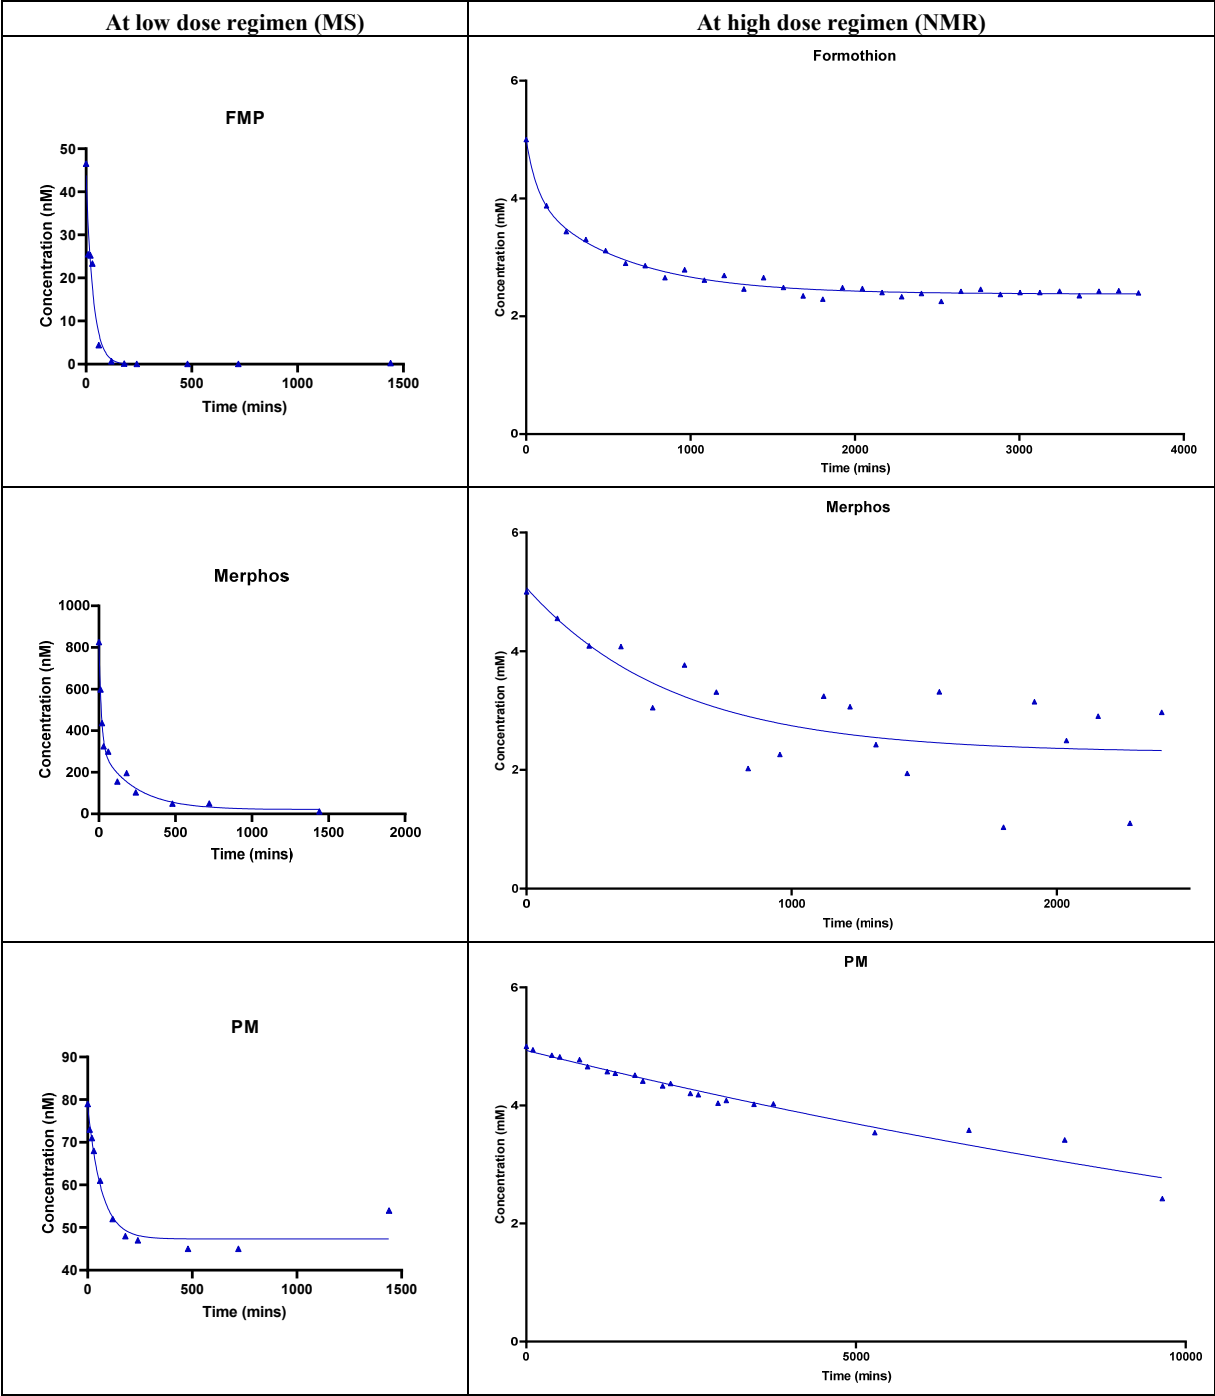

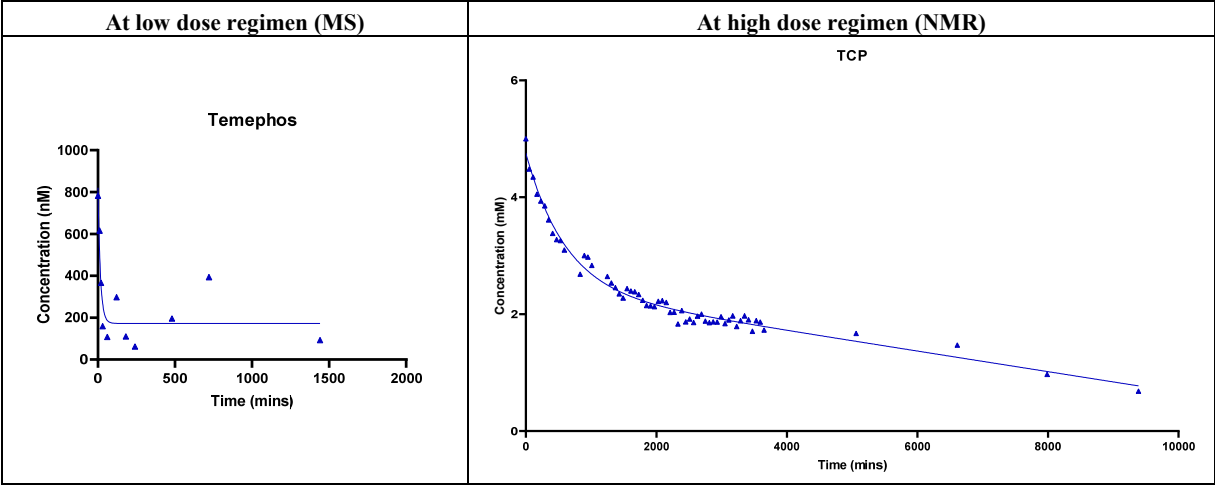

Supplement: s1 [file s1]
